# Supplementary material
Source: publisher figshare collection journal article supplement (https://acs.figshare.com/ndownloader/files/12177410)
Supplement: Supplementary file 1 [file 12177410]

## Supporting Information

### Engineering Multifunctional Coatings on Nanoparticles Based on Oxidative

### Coupling Assembly of Polyphenols for Stimuli-Responsive Drug Delivery

*Hongshan Liang<sup>a,c</sup>, Bin Zhou<sup>b</sup>, Jing Li<sup>a,c</sup>, Xingnian Liu<sup>a,c</sup>, Ziyu Deng<sup>a,c</sup>, Bin Li<sup>a,c,d\*</sup>*

<sup>a</sup> College of Food Science and Technology, Huazhong Agricultural University, Wuhan 430070, China

<sup>b</sup> School of Food and Biological Engineering, Hubei University of Technology, Wuhan 430068, China

<sup>c</sup> Key Laboratory of Environment Correlative Dietology (Huazhong Agricultural University), Ministry of Education, China

<sup>d</sup> Functional Food Engineering & Technology Research Center of Hubei Province, China

\*Corresponding author: Bin Li

E-mail address: libinfood@mail.hzau.edu.cn

## **Experimental**

### **1. Materials**

Zein (Z0001) was purchased from Tokyo Chemistry Industry, Co., Ltd. (Tokyo, Japan). Tannin acid (TA) was purchased from Aladdin Chemistry Co., Ltd. (-)-epigallocatechin-3-gallate (EGCG) was purchased from Xi'an Natural Field Bio-Technique Co., Ltd. (Xi'an China). Persimmon tannin (PT, 98.7% purity) was kindly provided by Shanghai Ocean University composed of polymers ranging from 7 to 20 kDa. 3-(N-morpholino)-propanesulfonic acid (MOPS) was obtained from the Sinopharm Chemical Reagents Co., Ltd. (Shanghai, China).

### **2. Preparation and characterization of polyphenol-coated zein NPs**

All solutions were freshly prepared for immediate use. The standard preparation process was described as follows: zein was dissolved in aqueous ethanol solutions (75% v/v) to obtain a stock solution with final concentration of 10 mg/mL. Then 0.5 mL zein solution was added to 9.5 mL of MOPS buffer (10 mM, pH 7.8). Next, different volume (40  $\mu$ L, 60  $\mu$ L, 80  $\mu$ L or 100  $\mu$ L) of TA solution (24 mM) was added and the dispersion was under vigorous stirring for 1 h at room temperature. The product was then purified by successive dialysis (MWCO 3500) against deionized water for 48 h to remove the free TA. Then 200  $\mu$ L of H<sub>2</sub>AuCl<sub>4</sub> aqueous solutions (10 mM) was added in the zein-TA solution to observe the metallization of gold.

**UV-vis spectroscopy:** The UV-vis absorption spectra of polyphenol-coated zein NPs solutions were measured on a spectrophotometer (UV-1100, MAPADA).

Table S1. Characterization of NPs (pH 7.4), the results were displayed as the mean  $\pm$  standard deviation (n=3).

| Samples              | size, nm       | PDI             | zeta potential, (mV) |
|----------------------|----------------|-----------------|----------------------|
| zein                 | 89.2 $\pm$ 1.2 | 0.15 $\pm$ 0.04 | -25.2 $\pm$ 1.6      |
| zein/TA <sub>1</sub> | 66.9 $\pm$ 0.6 | 0.21 $\pm$ 0.01 | -35.1 $\pm$ 0.5      |
| zein/TA <sub>2</sub> | 76.0 $\pm$ 1.5 | 0.22 $\pm$ 0.02 | -37.9 $\pm$ 0.7      |
| zein/TA <sub>3</sub> | 85.4 $\pm$ 1.4 | 0.25 $\pm$ 0.01 | -38.6 $\pm$ 0.3      |
| zein/TA <sub>4</sub> | 85.2 $\pm$ 1.8 | 0.24 $\pm$ 0.02 | -40.4 $\pm$ 1.6      |

zein represented zein nanoparticles; zein/TA<sub>1</sub>, zein/TA<sub>2</sub>, zein/TA<sub>3</sub> and zein/TA<sub>4</sub> represented TA-coated zein nanoparticles with TA volume of 40, 60, 80 and 100  $\mu$ L respectively.

Table S2. IC<sub>50</sub> Values for DOX or DOX-loaded NPs against HeLa cells.

| Samples        | Cell | IC <sub>50</sub> (μg/mL) |
|----------------|------|--------------------------|
| DOX            | HeLa | 0.918±0.05               |
| DOX-zein       | HeLa | 0.939±0.04               |
| DOX-zein/TA    | HeLa | 1.087±0.02**             |
| DOX- zein/EGCG | HeLa | 0.941±0.02               |
| DOX-zein/PT    | HeLa | 1.192±0.03**             |

DOX represented free doxorubicin; DOX-zein represented DOX loaded zein nanoparticles; DOX-zein/TA, DOX-zein/EGCG and DOX-zein/PT represented DOX-loaded TA/EGCG/PT-coated zein nanoparticles with TA/EGCG/PT volume of 60 μL. Data displayed as mean±SD (n=3). \*p < 0.05; \*\*p < 0.01; versus DOX group.

Table S3. Characterization of NPs or DOX-loaded NPs (pH 7.4), the results were displayed as the mean  $\pm$  standard deviation (n=3).

| Samples        | size, nm        | PDI             | zeta potential, (mV) | encapsulation efficiency (%) |
|----------------|-----------------|-----------------|----------------------|------------------------------|
| zein/EGCG      | 67.9 $\pm$ 1.1  | 0.25 $\pm$ 0.02 | -37.5 $\pm$ 1.6      | -                            |
| zein/PT        | 96.4 $\pm$ 1.0  | 0.27 $\pm$ 0.01 | -38.3 $\pm$ 0.9      | -                            |
| DOX- zein/EGCG | 95.3 $\pm$ 1.6  | 0.12 $\pm$ 0.03 | -32.9 $\pm$ 0.7      | 85.3 $\pm$ 0.4               |
| DOX-zein/PT    | 120.1 $\pm$ 3.1 | 0.18 $\pm$ 0.01 | -32.3 $\pm$ 1.2      | 95.7 $\pm$ 0.6               |

zein/EGCG and zein/PT represented EGCG/PT-coated zein nanoparticles with EGCG/PT volume of 60  $\mu$ L. DOX-zein/EGCG and DOX-zein/PT represented DOX-loaded EGCG/PT-coated zein nanoparticles with EGCG/PT volume of 60  $\mu$ L.

Figure S1

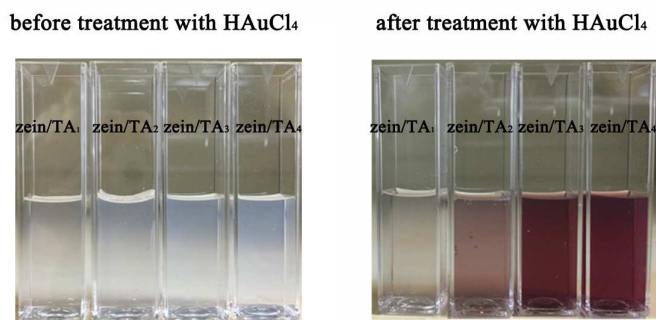

Figure S1. Photographs of zein/TA<sub>1</sub>, zein/TA<sub>2</sub>, zein/TA<sub>3</sub> and zein/TA<sub>4</sub> NPs before (left) and after (right) treatment with aqueous HAuCl<sub>4</sub>.

Figure S2

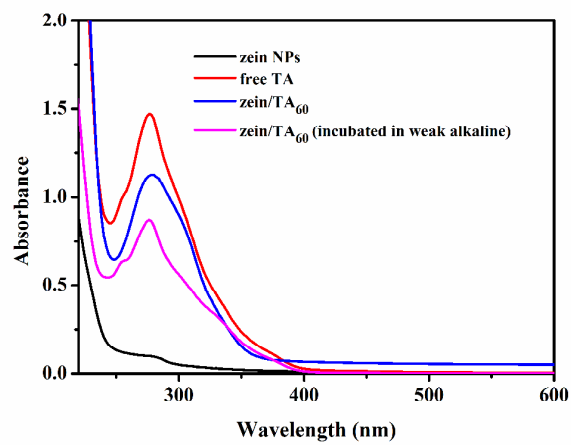

Figure S2. UV-vis spectra of zein NPs, free TA, zein/TA<sub>1</sub> NPs without incubation, zein/TA<sub>1</sub> NPs incubated in weak alkaline.

Figure S3

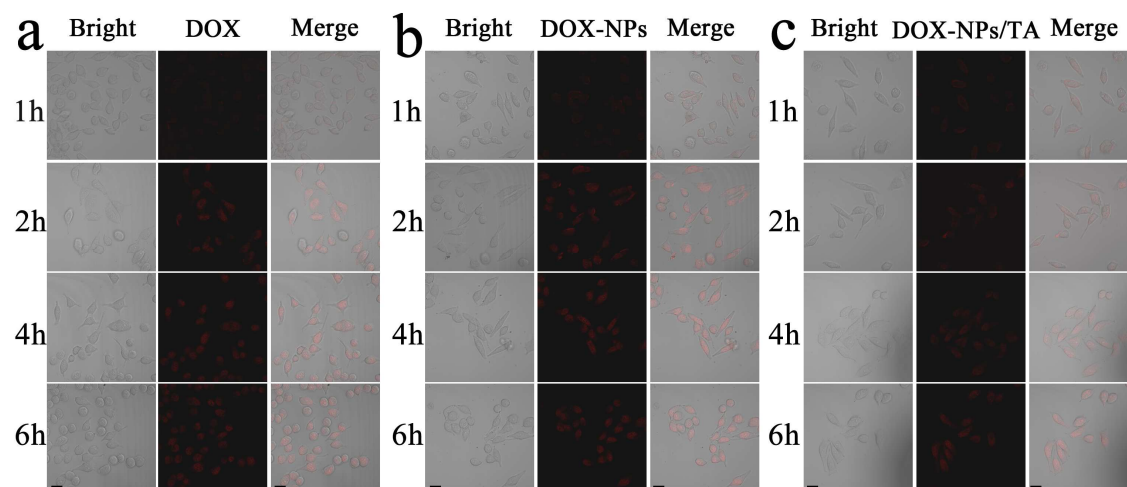

Figure S3. CLSM images of intracellular uptake of free DOX (a), DOX-loaded zein NPs (b) and DOX-loaded zein/TA NPs (c) by HeLa cells with DOX concentration of 1.0 μg/mL. The scale bars represented 20 μm.



Figure S4

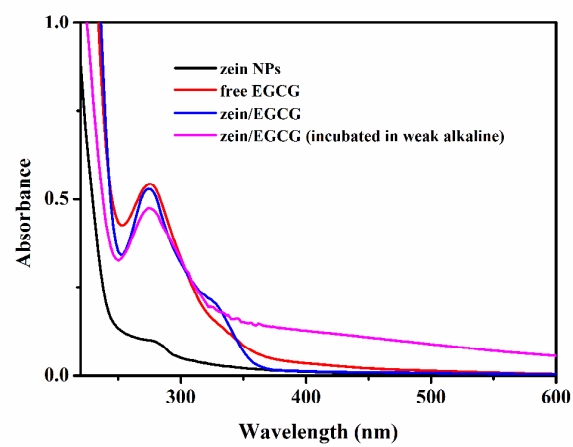

Figure S4. UV-vis spectra of zein NPs, free EGCG, zein/EGCG NPs without incubation, zein/EGCG NPs incubated in weak alkaline.

Figure S5

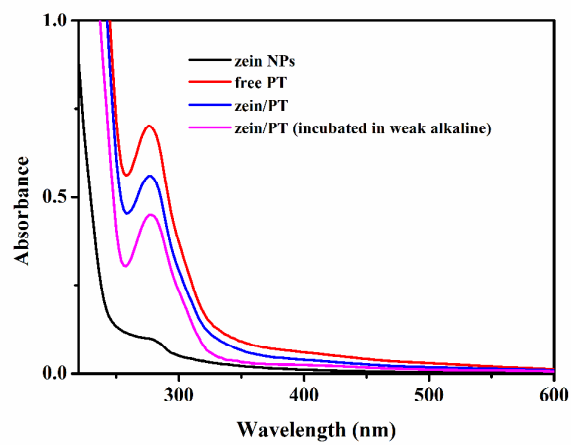

Figure S5. UV-vis spectra of zein NPs, free PT, zein/PT NPs without incubation, zein/PT NPs incubated in weak alkaline.

Figure S6

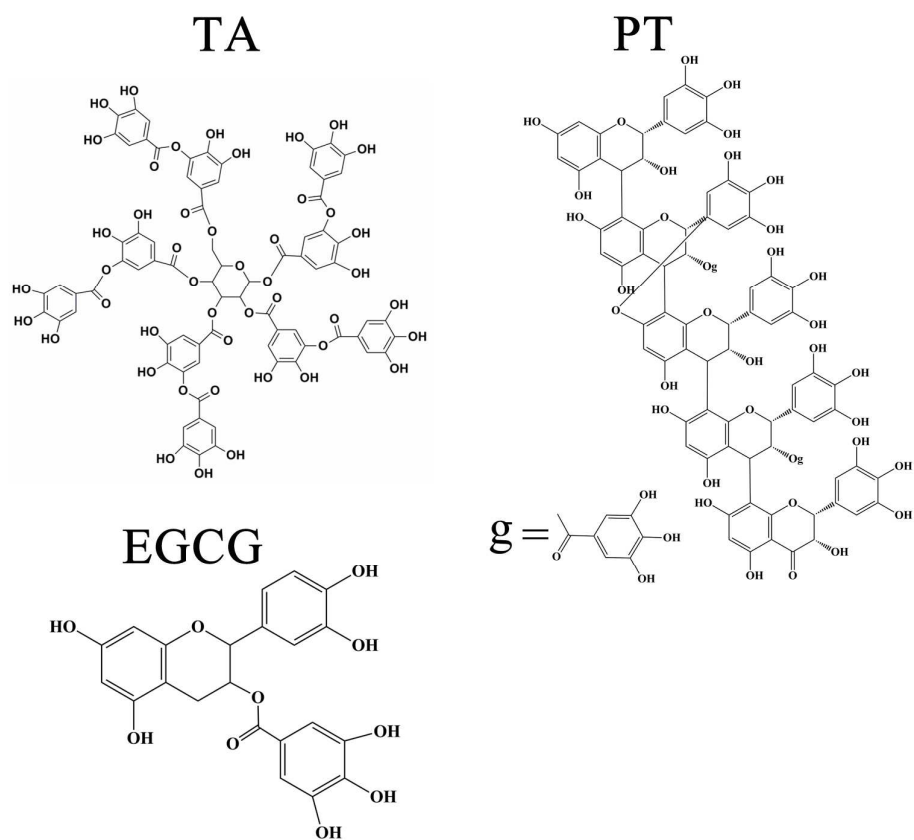

Figure S6. Chemical structure of TA, EGCG and PT.
